# Supplementary material for: Identification of immune activation-related gene signature for predicting prognosis and immunotherapy efficacy in lung adenocarcinoma
Source: PubMed Central journal article supplement (PMC10364982; doi:10.3389/fimmu.2023.1217590), 2023-07-07
Supplement: DataSheet_1.pdf [file DataSheet_1.pdf]

## SUPPLEMENTARY MATERIALS

Table S1. Clinical information of LUAD patients used to validate mRNA expression.

| Patients | Gender | Ages | TNM stage |
|----------|--------|------|-----------|
| 1        | Male   | 47   | II A      |
| 2        | Female | 49   | II A      |
| 3        | Male   | 63   | II A      |
| 4        | Female | 61   | II B      |
| 5        | Male   | 53   | II A      |
| 6        | Female | 50   | III A     |
| 7        | Male   | 47   | II A      |
| 8        | Male   | 67   | II A      |
| 9        | Female | 69   | II A      |
| 10       | Male   | 72   | II B      |
| 11       | Male   | 70   | II B      |
| 12       | Male   | 65   | II A      |

Table S2. The immune activation-related genes used in this study

| Immune activation-related genes |       |        |       |         |
|---------------------------------|-------|--------|-------|---------|
| HLA-A                           | IFNG  | GZMK   | CXCR6 | CD8B    |
| HLA-B                           | IDO1  | CD2    | LAG3  | GZMA    |
| CXCL10                          | CIITA | CXCL13 | STAT1 | PRF1    |
| CXCL9                           | CD3E  | NKG7   | GZMB  | TNFRSF8 |
| HLA-DRA                         | CCL5  | HLA-E  | CD8A  | TAGAP   |

Table S3. Primer list used in this study

| Primer names   | Upstream base sequence  | Downstream base sequence |
|----------------|-------------------------|--------------------------|
| CIITA          | CCTGGAGCTTCTTAACAGCGA   | TGTGTCGGGTTCTGAGTAGAG    |
| GZMK           | GGGGCTTATATGACTCATGTGTG | GTGGATCAATCAGAACACCTCC   |
| CXCR6          | GACTATGGGTTTCAGCAGTTTCA | GGCTCTGCAACTTATGGTAGAAG  |
| STAT1          | CAGCTTGACTCAAAATTCCTGGA | TGAAGATTACGCTTGCTTTTCT   |
| $\beta$ -actin | CACAGAGCCTCGCCTTTGCC    | CATGCCGGAGCCGTTGTGCG     |

**Figure S1.** Risk scores in different lung adenocarcinoma patients.

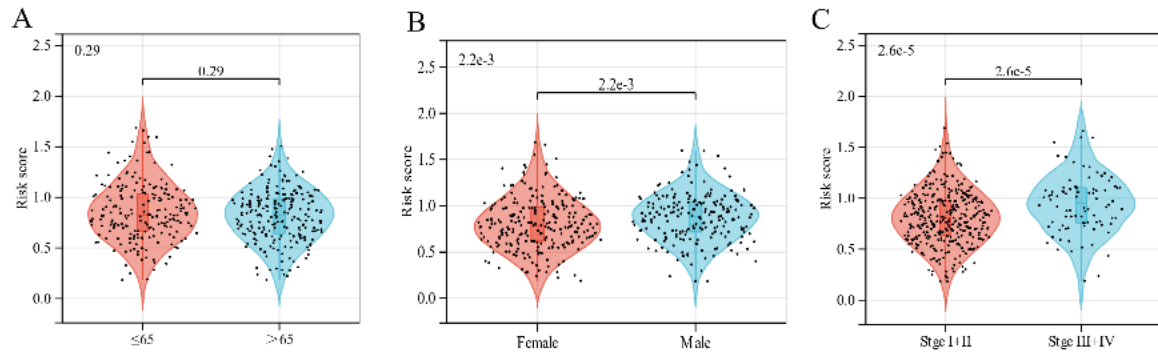

(A) Risk scores between patients  $\geq 65$  years old and  $< 65$  years old; (B) Risk scores between female and male; (C) Risk scores between patients of pathological stage I and pathological stage II.

**Figure S2.** Correlation of IARGI risk score with PDL1 expression, tumor mutational load (TMB).

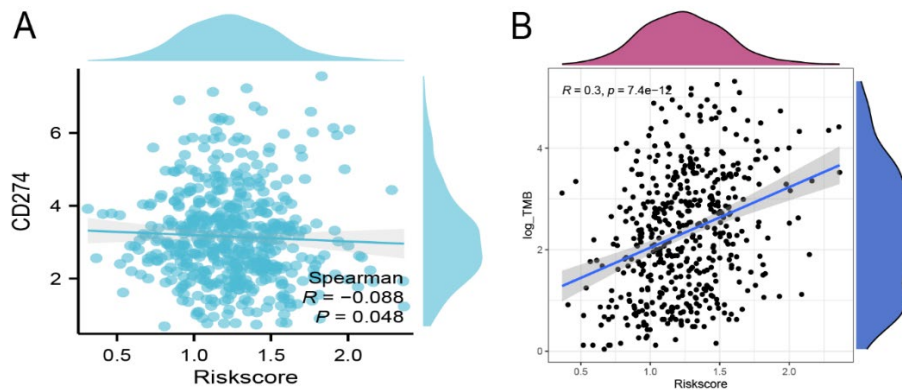

(A) IARGI risk score negatively correlates with PDL1 expression; (B) IARGI risk score positively correlated with TMB.
